# Supplementary material for: Benthic community structure on coral reefs exposed to intensive recreational snorkeling
Source: PLoS One. 2017 Sep 5;12(9):e0184175. doi: 10.1371/journal.pone.0184175 (PMC5584949; doi:10.1371/journal.pone.0184175)
Supplement: S1 Table — Raw data on (a) visitation rates within examined sections of Akumal Bay, Mexico, (b) percent cover of benthic organisms, and (c) abundance of sea urchins on coral reefs surveyed in the bay. See map Fig 1 and text for details. (XLSX) [file pone.0184175.s001.xlsx]

## Sheet: Visitor Abundance
Table S1. (a) Raw data on visitation rates at Akumal Bay, Mexico. See map Fig 1 and text for details.
		Number of visitors in each section of the bay (A-J) during each of 7 2-hour periods (06:00 - 18:00) between dawn and dusk, on each of 5 observation dates:
Bay Section	Date	06:00:00	08:00:00	10:00:00	12:00:00	14:00:00	16:00:00	18:00:00
A	2015-07-10	3	11	5	43	24	44	16
A	2015-07-12	0	6	55	23	36	47	8
A	2015-07-26	0	11	22	39	29	52	21
A	2015-07-29	1	5	50	25	30	47	34
A	2015-07-30	0	6	25	28	9	38	17
B	2015-07-10	20	35	71	92	101	158	130
B	2015-07-12	7	38	83	113	120	117	71
B	2015-07-26	0	12	59	71	114	135	61
B	2015-07-29	7	21	70	79	72	89	81
B	2015-07-30	3	32	96	93	72	101	49
C	2015-07-10	1	1	16	316	88	76	55
C	2015-07-12	2	6	71	86	154	232	99
C	2015-07-26	0	3	60	65	76	113	41
C	2015-07-29	1	0	17	63	59	67	48
C	2015-07-30	0	2	40	85	62	71	25
D	2015-07-10	3	24	118	254	345	316	250
D	2015-07-12	0	31	138	340	475	552	389
D	2015-07-26	0	16	116	312	351	250	175
D	2015-07-29	0	18	105	185	237	259	106
D	2015-07-30	0	68	124	218	226	249	145
E	2015-07-10	0	0	0	0	0	0	0
E	2015-07-12	0	0	0	0	0	0	0
E	2015-07-26	0	0	0	0	0	0	0
E	2015-07-29	0	0	0	0	0	7	0
E	2015-07-30	0	5	11	20	0	5	0
F	2015-07-10	0	0	0	10	13	6	2
F	2015-07-12	0	0	6	0	8	12	0
F	2015-07-26	0	0	8	9	17	4	2
F	2015-07-29	0	0	5	20	16	12	0
F	2015-07-30	0	0	5	14	4	6	0
G	2015-07-10	0	0	31	2	0	8	2
G	2015-07-12	0	0	0	0	3	7	1
G	2015-07-26	0	0	5	27	6	18	0
G	2015-07-29	0	2	3	13	4	8	0
G	2015-07-30	0	0	8	6	6	9	0
H	2015-07-10	4	24	59	66	50	39	25
H	2015-07-12	1	19	43	70	56	53	34
H	2015-07-26	0	3	19	14	58	61	10
H	2015-07-29	0	0	13	31	18	18	19
H	2015-07-30	0	23	67	126	64	69	6
I	2015-07-10	2	5	143	123	110	117	31
I	2015-07-12	0	20	44	147	130	110	26
I	2015-07-26	0	3	100	155	52	33	30
I	2015-07-29	0	4	95	81	64	77	29
I	2015-07-30	0	4	132	126	36	79	6
J	2015-07-10	0	7	207	306	326	337	162
J	2015-07-12	0	20	132	270	332	343	198
J	2015-07-26	0	9	191	281	265	217	48
J	2015-07-29	0	45	113	123	200	187	88
J	2015-07-30	0	14	218	236	210	227	79

## Sheet: Benthic Percent Cover
Table S1. (b) Raw data on percent cover of benthic organisms on coral reefs at Akumal Bay, Mexico. See map Fig 1 and text for details.																										Note: Gorgonians (soft corals) and sea fans were combined in the results reporting as simply "gorgonians".
Data are presented as mean percent cover from 3 randomly-selected quadrats examined per transect, for each of 10 transects per coral reef site.
	Type of taxon:	Stony Corals by Species															Stony Corals by Growth Form			All	Macroalgae by Growth Form				All	Other Benthic Organisms
Coral reef site	Transect	A agaricites	A tenuifolia	D clivosa	D strigosa	O annularis	O faviolata	M cavernosa	P astreoides	P divaricata	P furcata	P porites	S sideraea	A cervicornis	A palmata	Other corals	Mounding	Branching	Plating	Stony Corals	Crustose Coralline Algae	Erect Calcified Macroalgae	Erect Fleshy Macroalgae	Turf Algae	Macrolgae	Millepora fire corals	Gorgonians	Sea Fans	Zoanthids	Sea anemones	Sponges
1	1	0	0.333333	0	5.33333	0	1	8.66667	2.66667	0	0	0	2.33333	0	0	0	20	0	0.333333	20.3333	12.3333	0	0.666667	8	21	3	0	3.33333	0	0	0
1	2	0.666667	17	0	0	0	0	0	0.333333	0.333333	0	0	1.66667	0	26.6667	0	2	27	17.6667	46.6667	22.3333	0	1.66667	5	29	0.666667	0	0.666667	0.333333	0	9.33333
1	3	2.66667	0.333333	0	0	0	0	0	1.33333	0	0	0	1.66667	0	30	0	3	30	3	36	47.6667	1	0	11	59.6667	1	0.666667	0	0	0	0
1	4	0	2	0.666667	0.666667	0	0	0	0	0.333333	0	0	0.333333	0	16.6667	0	1.66667	17	2	20.6667	36	1.33333	4.66667	13.3333	55.3333	9.33333	0	1.33333	0.333333	0	8
1	5	0	0	0	6.66667	0	2	0	0.333333	0	0	0	0	0	0	0	9	0	0	9	37.8333	2	1.66667	39	80.5	3	0.666667	3.33333	0.166667	0	0
1	6	0	13.3333	0	0	1.33333	0	0	0	0	0	0	1	0	1	0	2.33333	1	13.3333	16.6667	4.33333	3.33333	5.33333	25.6667	38.6667	10	0.333333	5	0	0	0
1	7	3.33333	0	0	2	0	0	0.333333	1	0	0	0.333333	0	0	1	0	3.33333	1.33333	3.33333	8	57.6667	0	0.666667	12	70.3333	3.66667	0	7.66667	0	0	0
1	8	0.333333	0.333333	0	14	0.666667	0	0	0	0.333333	0	0	0	0	0	0	14.6667	0.333333	0.666667	15.6667	18	6	10	41	75	0	0.666667	5.33333	0.666667	0	0
1	9	0	0	0	6	0	0	0	1.66667	0	0	0	0	0	0	0	7.66667	0	0	7.66667	19	4	4.66667	18.3333	46	3.33333	0.666667	14	1	0	0
1	10	0	0.333333	0	8.33333	0	0	1	0.666667	0	0	0	2.66667	0	0	0	12.6667	0	0.333333	13	21.3333	4	7.33333	42.1667	74.8333	2.66667	0	1.33333	0.166667	1	0
2	1	0	3	0	3.33333	0	0	0	0.333333	0	0.666667	0.333333	0.333333	0	0	0	4	1	3	8	60	0.666667	5	0	65.6667	0	15	0	0	0.333333	0
2	2	0	1	0	0	0	0	0	0	0	0.666667	0	0	0	0	0.333333	0	0.666667	1	1.66667	4	5.33333	19	47.3333	75.6667	0	9.33333	0.333333	2	0	0
2	3	0.166667	0	0	0	0	0	0	0	0	2	0	0	0	0	0.166667	0	2	0.166667	2.16667	18	7.66667	11.3333	27.5	64.5	0	14.3333	1.33333	1.16667	0	0
2	4	0.333333	4	0	0	0	0	0	0.333333	0	1	0	1	0	0	1.33333	1.33333	1	4.33333	6.66667	21.3333	6	8	41.6667	77	0	13	0.333333	0	0	0
2	5	0	2.66667	0	0	0	3.66667	0	0	0	0	0	0	0	0	3	3.66667	0	2.66667	6.33333	15.6667	8.33333	2.33333	13	39.3333	0.666667	11.3333	0	2	0	0
2	6	0	19.8333	0	0.666667	0	0	0	0	0	0	0.166667	0	0	0	0	0.666667	0.166667	19.8333	20.6667	24	3.33333	6.66667	8.66667	42.6667	0	35	0	0.333333	0	0
2	7	0	1.66667	0	0	0	0	0	0	3.33333	0	0	0	0	0	0	0	3.33333	1.66667	5	73.3333	5	9	0	87.3333	0	6	0	1	0	0
2	8	0	1.33333	0	0	0	4.66667	0	0.333333	0	3.33333	0	0	0	0	0	5	3.33333	1.33333	9.66667	24	21.5	7	4	56.5	0	28	0	2.5	0	0
2	9	0.166667	0	0	0	0.666667	0	0	0	0.333333	0	0	0	0	0	0	0.666667	0.333333	0.166667	1.16667	0	26.6667	26.6667	30.8333	84.1667	0.666667	10.6667	0	0	0	0
2	10	0	1	0	0	0	0	0	0	3	0	0	0	0	0	0	0	3	1	4	2.66667	12.6667	26.3333	33.6667	75.3333	0.333333	13	0	1.66667	0	0
3	1	0	4.66667	0	0	3.33333	0	0	0.333333	0	0.333333	0	0	0	0	0	3.66667	0.333333	4.66667	8.66667	5	6.33333	6	59.6667	77	0	6.33333	0	0.666667	0	0
3	2	0	1.66667	0	0	1.33333	0	0	1	0	0.333333	0	2	0	0	0	4.33333	0.333333	1.66667	6.33333	2.33333	4.66667	2.66667	65.5	75.1667	0	14.3333	0	1.16667	0	0
3	3	0	0.666667	0	0	0	2	0	1	0	0	0.166667	0	0	0	0	3	0.166667	0.666667	3.83333	2	6.66667	3.33333	45.3333	57.3333	0	8.33333	0	0.333333	0	0
3	4	0	2.33333	0	0	2.66667	1.66667	0	0	0	0	0.333333	0	0	0	0	4.33333	0.333333	2.33333	7	2	5.33333	3	58.3333	68.6667	0	17.3333	0	1	0.333333	0
3	5	0	16.6667	0	1.66667	0.333333	2	0	0.666667	0	2	0	0	0	0	0	4.66667	2	16.6667	23.3333	2.66667	9	7	29.3333	48	0	14.3333	0	0	0.333333	0
3	6	0	10.6667	0	0	1.33333	1.66667	0	0.333333	0.666667	0	0	0.166667	0	0	0	3.5	0.666667	10.6667	14.8333	3.33333	6.33333	3.33333	50.3333	63.3333	0.333333	16.6667	0	0	0	1.33333
3	7	0	12.6667	0	0	2	1.33333	0	0.666667	0	2	0	0	0.666667	0	0	4	2.66667	12.6667	19.3333	12	6.66667	4	44.6667	67.3333	0	10.6667	0	0.666667	0.333333	0
3	8	0	4.33333	0	0	1	0	0	1.66667	1.33333	0	0	0	1.33333	0	0	2.66667	2.66667	4.33333	9.66667	0	13	3.66667	54.6667	71.3333	0.333333	11	0.333333	0	0	0
3	9	0	1.66667	0	0	0	0	0	2.33333	0.666667	1.66667	0	0	1.66667	0	0	2.33333	4	1.66667	8	43.3333	5.33333	10.3333	18	77	0	12	0	0	0	0
3	10	0	0.333333	0	0	0.333333	0	0	0	0	1	0	0	0	0	0	0.333333	1	0.333333	1.66667	17.3333	19.6667	8.33333	38.3333	83.6667	0	9.66667	0	2.33333	0	0
4	1	0	0	0	0	5.66667	0.333333	0	0	0	0	0	0	0	0	0.333333	6	0	0	6	0	0.666667	3	38.3333	42	0	4	0	0.333333	0	0.333333
4	2	0	0	0	0.666667	0	1	0	0	0	0	0	0	0	0	0	1.66667	0	0	1.66667	2	0	2.33333	51	55.3333	0	14.6667	0	0	0	0.333333
4	3	0	0	0	0	3	0	0	0.333333	0	0	0	0	0	0	0	3.33333	0	0	3.33333	0.666667	0	0.333333	83.6667	84.6667	0	10	0	0	0	0
4	4	0	0	0	0	0.333333	0	0	1.66667	0.666667	0	0	0	1.33333	0	0	2	2	0	4	1.33333	1.33333	2.66667	57.3333	62.6667	0	5.66667	0	0	0	0.333333
4	5	0	0	0	0	0.666667	0	0	4.66667	0	2.66667	0	0	0.333333	0	1	5.33333	3	0	8.33333	0	0	2	48	50	0	11.3333	0	0.666667	0	0
4	6	0	0	0	0	0.666667	0	0	2.66667	0	0	0	0	1.33333	0	0	3.33333	1.33333	0	4.66667	0.333333	0.333333	3.66667	57.6667	62	0	5.33333	0	0	0	0
4	7	7.33333	0	0	0	0.666667	0	0	1.33333	0	2.66667	0	0	0.666667	0	2	2	3.33333	7.33333	12.6667	2	0	6.33333	49	57.3333	0	4.33333	0	0	0	0
4	8	14	0	0	0	1.33333	0	0	1.33333	0	1.33333	0	0	0	0	0	2.66667	1.33333	14	18	13.6667	1	1.66667	61.6667	78	0	4	0	0	0	0
4	9	10	0	0.666667	4.66667	0.666667	0	0	0	0	0	0	0	11	0	0.666667	6	11	10	27	12	0	0.666667	53.6667	66.3333	0.666667	4.66667	0	0	0	0
4	10	2.66667	0	0	1.33333	1.33333	0	0	0	0.666667	0	0	0	0	0	0	2.66667	0.666667	2.66667	6	4.66667	0	0.666667	49	54.3333	0	9	0	0	0	0
5	1	0.666667	4.33333	0	0	5.66667	0	0	2.33333	0	1.66667	0	0	0	0	0	8	1.66667	5	14.6667	8.66667	2.33333	2.33333	62.3333	75.6667	0	8.66667	0	0	0.333333	0
5	2	0.333333	2.66667	0	0	0	9	0	4	0	0	0.333333	3.33333	0	0	0	16.3333	0.333333	3	19.6667	9	4	2	40.1667	55.1667	0	19.3333	0	0.166667	0.333333	0
5	3	3	0	0	0	4.66667	1	0	0.333333	0	0	0	0	0	0	0	6	0	3	9	2.66667	3.66667	2	68.6667	77	0	12	0	0	0	0
5	4	0	0.666667	0	2.33333	1.66667	3.66667	0	2.5	0	0.666667	0.333333	1.33333	0	0	0	11.5	1	0.666667	13.1667	9	5.33333	5	17.5	36.8333	0	7.66667	0	0.666667	0.333333	0
5	5	1.33333	0.666667	0	0	2	0	0	0.666667	0	0	0	0	0	0	0	2.66667	0	2	4.66667	3	10.3333	7.33333	51	71.6667	0	16.3333	0	0	0	0
5	6	0	0	0	0	0	9	0	1.66667	0	0.666667	0.666667	1.33333	0	0	0	12	1.33333	0	13.3333	13.6667	9	3.66667	33	59.3333	0	11	0	1.33333	0.666667	0
5	7	0	0	0	0	2.66667	4.66667	0	0.333333	0	0	0	0	0	0	0	7.66667	0	0	7.66667	1.66667	4.66667	3.33333	68	77.6667	0.166667	9	0	0.166667	0.333333	0
5	8	0.333333	0	0	0	2	9.33333	0	0.333333	0	1.33333	0	6.66667	0	0	0	18.3333	1.33333	0.333333	20	7	2.33333	26.6667	22.3333	58.3333	0	8	0.666667	0.333333	0.166667	1.16667
5	9	0	0	0	0	8.33333	1	0	0.666667	0.333333	14	0	0	0	0	0	10	14.3333	0	24.3333	3	6.33333	9.33333	46.6667	65.3333	0	6	0	0	0	0
5	10	1.16667	0.333333	0	0	3.33333	2.66667	0	0.666667	4	1.33333	0	0	0	0	0	6.66667	5.33333	1.5	13.5	2	10.3333	13.3333	31.8333	57.5	0	24.6667	0.333333	0	0	0
6	1	2	0	0	0	0.333333	21	0	3.33333	0	0	0	0	0	0	0	24.6667	0	2	26.6667	5.66667	5	2.66667	50	63.3333	0	1.66667	0	0	1	0
6	2	1	0	0	0	7.33333	4.66667	0	0	0	0	0	1	0	0	0	13	0	1	14	3	4	3.66667	70	80.6667	0.333333	0.333333	0	0	0	0
6	3	0	2	0	0	1.66667	8.66667	0	0.333333	0	0	0.666667	2.66667	0	0	0	13.3333	0.666667	2	16	3.66667	4.66667	6.33333	44.3333	59	0	2.33333	0	0	0	0
6	4	2.33333	0	0	0	4.33333	1.33333	0	2	0	1	0.333333	0	0	0	1	7.66667	1.33333	2.33333	11.3333	6	5.66667	2.66667	28.3333	42.6667	0	0	0	0	0	0
6	5	0	0.333333	0	0	6.33333	0.666667	0	1.33333	0	0	0.166667	2	0	0	0	10.3333	0.166667	0.333333	10.8333	5.66667	4.66667	3	52.8333	66.1667	0	11.6667	0	0	0	0
6	6	0.333333	0	0	0	2.33333	0	0	1	0	0	0.333333	0	0	0	0.666667	3.33333	0.333333	0.333333	4	2.66667	0.666667	4.33333	45.6667	53.3333	0	0	0	0	0	0
6	7	0.666667	0	0	0	4.33333	0	0	0.333333	0	0	0	0	0	0	1.33333	4.66667	0	0.666667	5.33333	7.66667	2	6.33333	75.3333	91.3333	0	0	0	0	0.333333	0
6	8	0	0	0	0	4	0	0	0	0	0	0	0	0	0	0	4	0	0	4	2	0	2.66667	34.3333	39	0	0	0	0	0.333333	0
6	9	0.333333	0	0	0	8.33333	0.666667	0	3.66667	0	2	0	0	0	0	0.666667	12.6667	2	0.333333	15	9.33333	0.666667	3.33333	64.3333	77.6667	0	1.66667	0	0	0	0
6	10	2.33333	1	0	0	0	0	0	5.66667	0	2.66667	0.333333	0	0	0	3.33333	5.66667	3	3.33333	12	11.6667	2	7	41.6667	62.3333	0	16	0	0.333333	1	0
7	1	0	0	0	0.166667	0	0.333333	0	0.5	0	0	0	0.166667	0	0	0	1.16667	0	0	1.16667	0.333333	8.66667	6.66667	22.5	38.1667	0.333333	28	0	0.333333	0	0
7	2	1.33333	0	0	0	0	0	0	0	0	0.166667	0	0	0	0	0.333333	0	0.166667	1.33333	1.5	3.33333	6	2.66667	59.5	71.5	0	10.3333	0	0.333333	0	0
7	3	0.166667	0	0	0	1.66667	6	0	0.166667	0	0	0.166667	1	0	0	0	8.83333	0.166667	0.166667	9.16667	4	13	4.66667	59.5	81.1667	1.33333	3.66667	0.333333	0.666667	0.333333	0
7	4	0.333333	0	0	0	1.66667	1	0	0	0	0	0	0.333333	0	0	0	3	0	0.333333	3.33333	2	8.66667	2.33333	69.6667	82.6667	0	7.33333	0	0.666667	0.333333	0
7	5	0.166667	0	0	2.66667	0	3	0	0.5	0	0	0.166667	0.333333	0	0	0	6.5	0.166667	0.166667	6.83333	5.33333	5	5	51.6667	67	0	13	0	0.166667	0	0
7	6	0.333333	0	0	0	5.33333	0	0	0.666667	0.333333	0	0	0	0	0	0	6	0.333333	0.333333	6.66667	3	4.66667	6	59.6667	73.3333	0	0.666667	0	0	0.333333	0
7	7	0.333333	0	0	0	11.6667	0	0	0.666667	0	0	0	0	0	0	0	12.3333	0	0.333333	12.6667	7.33333	7	7.33333	59.3333	81	0	2.33333	0	0	0.333333	0
7	8	0.166667	0.333333	0	0	11.6667	0	0	0.333333	0	0	0.333333	0	0	0	0	12	0.333333	0.5	12.8333	6	7.33333	3	60.1667	76.5	0	4	0	0	0	0
7	9	0	0	0	0	2	0	0	0.166667	0.666667	0	0	0	0	0	0	2.16667	0.666667	0	2.83333	3.33333	4.66667	10	68.8333	86.8333	0	9.33333	0	0	0	0
7	10	0.333333	0	0	0	12.6667	0	0	0	0.333333	0	0	0.333333	0	0	0	13	0.333333	0.333333	13.6667	3	3	7.33333	29.3333	42.6667	0	2	0.666667	0	0	0
8	1	0	4.66667	0	0	11	0	0	0	0	0	0.833333	0	0	0	0	11	0.833333	4.66667	16.5	6.66667	3	3	69.1667	81.8333	0	0.5	0.166667	0	0	0
8	2	0	0.333333	0	0	0	14.3333	0	0	0	0	0.166667	0	0	0	0	14.3333	0.166667	0.333333	14.8333	0.166667	6.66667	1	66.3333	74.1667	0	7.33333	1	0	0	0
8	3	0	2.16667	0	0	1.33333	7.33333	0	0	0	0	0.166667	0	0	0	0	8.66667	0.166667	2.16667	11	13.3333	4.16667	3	66.5	87	0	0.333333	0	0.333333	0.333333	0
8	4	0	5.66667	0	0	7.66667	1.33333	0	0	0	0.333333	0.166667	0	0	0	0	9	0.5	5.66667	15.1667	9	3	0.666667	70.5	83.1667	0	0.666667	0.666667	0.166667	0.166667	0
8	5	0	1.33333	0	0	0.833333	0	0	1	0.333333	1	0.333333	0	0	0	0	1.83333	1.66667	1.33333	4.25	1	6.66667	4	76.5	88.1667	0	3.33333	0.333333	0	0	0
8	6	0.333333	2	0	0	13.3333	1.33333	0	1	0	0	1.5	2	0	0	0.333333	17.6667	1.5	2.33333	21.5	7	11	3.33333	44.1667	65.5	0	5.66667	0.333333	0	0	0
8	7	0	0.5	0	0	0	0	0	0	0	0.166667	0	0	0	0	0	2.66667	0.666667	3.33333	6.66667	0	9	4.33333	62.6667	89.1667	0	14.6667	0	1.66667	0	0
8	8	0.166667	0.333333	0	0	0	1.66667	0	0.666667	0	1.33333	0	1.66667	0	0	2	5.33333	0.666667	4	10	1	4.66667	1.66667	58.1667	78.8333	0.333333	7.33333	1	0	0	4
8	9	0	0.333333	0	0	0	0.666667	0	0.166667	0	2	0.333333	0	0	0	0	7.66667	0.833333	4	12.5	0	12.6667	4.33333	38	70.1667	0	19.3333	0	0	0	0.166667
8	10	0	0.666667	0	0	6.33333	7	0	0	0	0	0.333333	0.333333	0	0	0	2.33333	0.5	0.666667	3.5	3.33333	5.66667	3.33333	52.6667	89.6667	0	5	0.333333	0.333333	0.333333	0
9	1	0	0	0	0	10	0	0	0.166667	0	0	0.333333	0.666667	0	0	0	10.8333	0.333333	0	11.1667	2	6.33333	1.33333	62.5	72.1667	0	4.66667	0	0.666667	0.333333	0.333333
9	2	0	0.166667	0	0	0	0	0	0.5	0	0	0	0	0	0	0	0.5	0	0.166667	0.666667	0	10	3.33333	61	74.3333	0	4.66667	0	0	0	0
9	3	0.166667	0.333333	0	0	0	0	0	2	0	0	0	1.66667	0	0	0	3.66667	0	0.5	4.16667	1.33333	20	1.33333	64.5	87.1667	0.166667	7	0	0.166667	0	0
9	4	0.333333	1.33333	0	0	0.166667	0	0	1	2.66667	0	0	0	0	0	0	1.16667	2.66667	1.66667	5.5	0	11.6667	0.666667	69.6667	82	0	6.33333	0	0.166667	0	0
9	5	0	0.333333	0	0	0	1	0	0.333333	0	0	0.166667	0	0	0	0	1.33333	0.166667	0.333333	1.83333	10	6.33333	0.333333	62.1667	78.8333	0	18.6667	0	0	0	0
9	6	0.333333	0.333333	0	0	0.333333	0	0	0.833333	0.333333	0	0	1	0.333333	0	0	2.16667	0.666667	0.666667	3.5	13.3333	11	0.666667	56.1667	81.1667	0	11	0.333333	0.333333	0	0
9	7	0	0.5	0	0	0	0	0	0	0	0.166667	0	0	0	0	0	0	0.166667	0.5	0.666667	0	9	4.33333	62.6667	76	0	14.6667	0	1.66667	0	0
9	8	0.166667	0.333333	0	0	0	1.66667	0	0.666667	0	1.33333	0	1.66667	0	0	2	4	1.33333	0.5	5.83333	1	4.66667	1.66667	58.1667	65.5	0.333333	7.33333	1	0	0	4
9	9	0	0.333333	0	0	0	0.666667	0	0.166667	0	2	0.333333	0	0	0	0	0.833333	2.33333	0.333333	3.5	0	12.6667	4.33333	38	55	0	19.3333	0	0	0	0.166667
9	10	0	0.666667	0	0	6.33333	7	0	0	0	0	0.333333	0.333333	0	0	0	13.6667	0.333333	0.666667	14.6667	3.33333	5.66667	3.33333	52.6667	65	0	5	0.333333	0.333333	0.333333	0
10	1	0.166667	0	0.333333	0.333333	0	0	0	0	0	0.333333	0.166667	1.16667	0	0	0	1.83333	0.5	0.166667	2.5	2	9.33333	3	68.8333	83.1667	0	3	0	1	0	0
10	2	0.333333	0	0	0	0.333333	0	0	0.5	0	1.66667	0	0.333333	0	0	0	1.16667	1.66667	0.333333	3.16667	3.33333	6.33333	3	76.8333	89.5	0.166667	5.66667	0.333333	0.166667	0	0
10	3	0	2	0	0	0.333333	3.33333	0	0	0	0	0.666667	0	0	0	0	3.66667	0.666667	2	6.33333	13.3333	6.66667	3	65.5	88.5	0	2.33333	0	0.5	0	0
10	4	0.166667	0.166667	0	0	1.16667	1	0	0.333333	0	0	0	0.333333	0	0	0	2.83333	0	0.333333	3.16667	0	5.5	1	82	88.5	0	4	0	0.333333	0	0
10	5	0.333333	0.333333	0	0	0	0.666667	0	0.5	0	0	0.333333	0	0	0	0	1.16667	0.333333	0.666667	2.16667	3	6.33333	1.33333	83	93.6667	0	1.66667	0.5	0.166667	0.166667	0
10	6	0	1	0	0	0.333333	0.333333	0	2.16667	0	0	0	0	0	0	0.333333	2.83333	0	1	3.83333	2.16667	4	1.33333	81.1667	88.6667	0.666667	2.33333	0.666667	0.166667	0	0
10	7	0.333333	0	0	0	2.33333	0	0	0	2.66667	0.333333	0.166667	0	0	0	0	2.33333	3.16667	0.333333	5.83333	8	7.66667	1.66667	64.5	81.8333	0	7.33333	0.166667	0.166667	0	0
10	8	0	0	0	0	4	0	0	0.333333	0	0	0	0	0	0	0.666667	4.33333	0	0	4.33333	2.33333	8.66667	1.33333	49.5	61.8333	0	2.33333	0.166667	0	0	0
10	9	0.166667	0.666667	0	0	1.66667	2.33333	0	0.666667	0	0	0.166667	0.166667	0	0	0	4.83333	0.166667	0.833333	5.83333	4.33333	4	1	80	89.3333	0	3	0	0.166667	0	0
10	10	0	1	0	0	1	0	0	0.666667	0	0	0.166667	0	0	0	0	1.66667	0.166667	1	2.83333	7	2.33333	3.33333	81.3333	94	0.166667	0.833333	1	0.166667	0.333333	0

## Sheet: Sea Urchin Abundance
Table S1. (c) Raw data of sea uchin abundance on coral reefs at Akumal Bay, Mexico. See map Fig 1 and text for details.
Data are presented as mean abundance from 3 randomly-selected quadrats examined per transect, for each of 10 transects per coral reef site.
Coral Reef Site	Transect	Diadema antillarum	Other Sea Urchin Species
1	1	2.33333	0
1	2	5.33333	0
1	3	1	0
1	4	4.66667	0
1	5	1.66667	0
1	6	2.66667	0
1	7	2.66667	0
1	8	1.66667	0
1	9	0.666667	0
1	10	4	0.333333
2	1	6.33333	0.666667
2	2	1.33333	0
2	3	0	0
2	4	1.33333	0
2	5	1.33333	0
2	6	2	0
2	7	0.333333	0
2	8	4.33333	0.333333
2	9	1.33333	0
2	10	0	0
3	1	0	0
3	2	0	0
3	3	0	0
3	4	0.333333	0
3	5	0	0
3	6	0.666667	0
3	7	0	0
3	8	0	0
3	9	0	0
3	10	0	0
4	1	0	0
4	2	0	0
4	3	0.333333	0
4	4	0	0
4	5	0	0
4	6	0	0
4	7	0	1.33333
4	8	0.333333	0.666667
4	9	0.666667	1.33333
4	10	0	0.666667
5	1	1.33333	0.333333
5	2	0	0.666667
5	3	0.666667	2.33333
5	4	0	0
5	5	0.666667	0
5	6	0	0.666667
5	7	0.333333	0.333333
5	8	0	0
5	9	0	0
5	10	0	0.333333
6	1	1	0
6	2	0	0
6	3	0.666667	0.666667
6	4	0.666667	0.333333
6	5	1	0
6	6	0	0
6	7	0	0
6	8	0	0
6	9	1.33333	0.333333
6	10	2	0.333333
7	1	0	0.333333
7	2	0	0
7	3	0.333333	2
7	4	0.666667	0.333333
7	5	0	0
7	6	0	0.333333
7	7	0	1
7	8	0	0.333333
7	9	0	0
7	10	0.333333	0
8	1	1.66667	3
8	2	0.666667	0.666667
8	3	3.66667	2
8	4	2	5.33333
8	5	0.666667	0
8	6	0.666667	0.333333
8	7	1	1
8	8	3.33333	0.666667
8	9	3	0.666667
8	10	0.333333	4.33333
9	1	0	5.66667
9	2	0	0
9	3	0	0
9	4	0	0
9	5	0	1.33333
9	6	0	0.666667
9	7	0	0.333333
9	8	0	0
9	9	0	0
9	10	0	1
10	1	0	0
10	2	0	0
10	3	0.333333	1.66667
10	4	0	0
10	5	1	0.666667
10	6	1	0.333333
10	7	0.333333	0.666667
10	8	0.333333	0
10	9	2.33333	0.333333
10	10	1.66667	0
